# Supplementary material for: An Integrated Sequencing Approach for Updating of Pseudorabies Virus Transcriptome
Source: Preprints.org preprint supplement (doi:10.20944/preprints202012.0616.v1), 2020-12-24
Supplement: Supplementary file 1 [file supplementary]

## Sheet: S2
Annotation type	Abundance	Start	Stop	Count	Strand	Transcript name	Previously annotated transcript?
LoRTIA	Medium	687	2284	13	+	ORF-1L1-S	No
LoRTIA	Medium	1500	2284	19	+	ORF-1M1-S	No
LoRTIA	Low	1736	2284	5	+	ORF-1.5	No
LoRTIA	Medium	1817	2284	14	+	ORF-1.5-S	No
LoRTIA	Very low	2769	4678	2	-	UL54-L	No
LoRTIA	Very low	2769	5960	3	+	UL53L-54	No
LoRTIA	Low	2769	3132	9	-	ul54.3-S2	No
LoRTIA	Medium	2769	3163	28	-	ul54.3-S	No
LoRTIA	Medium	2769	3342	29	-	UL54.4	No
LoRTIA	Medium	2769	3420	19	-	Ul54.5-S2	No
LoRTIA	Medium	2769	3631	21	-	Ul54.5-S	No
LoRTIA	Medium	2769	3744	17	-	Ul54.5	No
LoRTIA	Medium	2769	3272	18	-	ul54.3	No
LoRTIA	Low	7802	8514	8	+	UL51.5	No
LoRTIA	Low	8478	9791	7	-	UL50-L4	No
LoRTIA	Very low	8478	9743	1	-	Ul50-L3	No
LoRTIA	High	8478	9049	101	-	UL50.1	No
LoRTIA	Medium	8478	8988	25	-	UL50.1-S	No
LoRTIA	Low	8890	10414	6	+	Ul49.5L-49	No
LoRTIA	Very low	9104	16234	1	+	UL49.5-49-48-47-46	No
LoRTIA	Medium	9329	10414	21	+	UL49-L3	No
LoRTIA	Medium	9403	10414	62	+	UL49-L2	No
LoRTIA	High	9690	10414	147	+	UL49.1	No
LoRTIA	High	9921	10414	718	+	UL49.1-S	No
LoRTIA	High	10063	10414	180	+	UL49.1-S2	No
LoRTIA	Medium	10093	10414	60	+	UL49.1-S3	No
LoRTIA	Medium	10123	10414	38	+	UL49.1-S4	No
LoRTIA	Medium	10147	10414	33	+	UL49.1-S5	No
LoRTIA	Medium	10240	10414	39	+	UL49.1-S6	No
LoRTIA	Very low	10419	12072	1	+	UL48-L-AT	No
LoRTIA	Medium	11781	12072	12	+	nc-UL47	No
LoRTIA	Medium	12397	16234	12	+	UL46-L9	No
LoRTIA	Medium	12815	16234	14	+	UL46-L8	No
LoRTIA	Very low	13180	16234	3	+	UL46-L7	No
LoRTIA	Medium	13524	16234	17	+	UL46-L6	No
LoRTIA	Low	13542	16234	6	+	UL46-L5	No
LoRTIA	Low	13572	16234	6	+	UL46-L4	No
LoRTIA	Medium	13749	16234	13	+	UL46-L3	No
LoRTIA	Medium	13796	16234	16	+	UL46-L2	No
LoRTIA	Medium	13947	16234	54	+	UL46-L	No
LoRTIA	Low	14310	16234	10	+	UL46.10	No
LoRTIA	Medium	14442	16234	72	+	UL46.10-S	No
LoRTIA	Medium	14563	16234	51	+	UL46.9	No
LoRTIA	Medium	14727	16234	37	+	UL46.6	No
LoRTIA	Medium	14785	16234	47	+	UL46.6-S	No
LoRTIA	Medium	14821	16234	30	+	UL46.5	No
LoRTIA	Medium	14933	16234	75	+	UL46.5-S2	No
LoRTIA	Medium	15031	16234	15	+	UL46.5-S3	No
LoRTIA	Medium	15252	16234	29	+	UL46.2	No
LoRTIA	High	15606	16234	192	+	UL46.1	No
LoRTIA	Medium	15655	16234	71	+	UL46.1-S2	No
LoRTIA	High	15759	16234	190	+	UL46.1-S3	No
LoRTIA	Medium	15796	16234	50	+	UL46.1-S4	No
LoRTIA	Medium	15892	16234	38	+	nc-UL46	No
LoRTIA	Medium	16023	16234	38	+	nc-UL46-S	No
LoRTIA	Very low	16869	21931	1	-	UL28L-27	No
LoRTIA	Medium	16869	17164	15	-	UL27.2	No
LoRTIA	Medium	16869	17214	34	-	UL27.3-L	No
LoRTIA	Medium	16869	17256	95	-	UL27.3	No
LoRTIA	Medium	16869	17310	96	-	UL27.4-S4	No
LoRTIA	Medium	16869	17345	66	-	UL27.4-S3	No
LoRTIA	Medium	16869	17418	76	-	UL27.4-S2	No
LoRTIA	Medium	16869	17445	44	-	UL27.4-S	No
LoRTIA	Medium	16869	17509	33	-	UL27.4	No
LoRTIA	High	16869	17627	211	-	UL27.5-S3	No
LoRTIA	High	16869	17649	190	-	UL27.5-S2	No
LoRTIA	Medium	16869	17693	40	-	UL27.5-S	No
LoRTIA	Medium	16869	17783	48	-	UL27.5	No
LoRTIA	Medium	16869	17816	85	-	UL27.6-S	No
LoRTIA	Medium	16869	17854	50	-	UL27.6	No
LoRTIA	Medium	16869	17885	77	-	UL27.8	No
LoRTIA	Medium	16869	17922	60	-	UL27.9	No
LoRTIA	Medium	16869	17956	77	-	UL27.10-S	No
LoRTIA	High	16869	18009	202	-	UL27.10	No
LoRTIA	High	16869	18037	125	-	UL27.11-S7	No
LoRTIA	High	16869	18078	148	-	UL27.11-S6	No
LoRTIA	Medium	16869	18157	39	-	UL27.11-S5	No
LoRTIA	Medium	16869	18186	50	-	UL27.11-S4	No
LoRTIA	Medium	16869	18267	44	-	UL27.11-S3	No
LoRTIA	Medium	16869	18372	31	-	UL27.11-S2	No
LoRTIA	Medium	16869	18393	27	-	UL27.11-S	No
LoRTIA	Medium	16869	18447	41	-	UL27.11	No
LoRTIA	Medium	16869	18556	53	-	UL27.13	No
LoRTIA	Medium	16869	18750	67	-	UL27.14-S	No
LoRTIA	Medium	16869	18809	17	-	UL27.14	No
LoRTIA	Medium	21775	25497	32	+	UL29-S	No
LoRTIA	Low	21775	23554	10	-	UL29.11	No
LoRTIA	Medium	21775	23956	12	-	UL29.14	No
LoRTIA	Medium	28694	29059	50	-	UL31.3-S	No
LoRTIA	Medium	28694	29311	45	-	UL31.3	No
LoRTIA	Medium	28694	29351	43	-	UL31.2	No
LoRTIA	Medium	29603	32683	12	+	UL33L3-34-35	No
LoRTIA	High	31194	32683	156	+	UL34L2-35	No
LoRTIA	Medium	31304	32683	21	-	UL34L-35	No
LoRTIA	Medium	31614	32683	12	+	UL35-L6	No
LoRTIA	Medium	31675	32683	13	+	UL35-L5	No
LoRTIA	Low	31739	32683	10	+	UL35-L4	No
LoRTIA	Medium	31955	32683	15	+	UL35-L3	No
LoRTIA	Medium	32115	32683	14	+	UL35-L2	No
LoRTIA	Medium	32198	32683	24	+	UL35-L	No
LoRTIA	Medium	32360	32683	43	+	UL35.2	No
LoRTIA	Medium	33127	33283	100	+	nc-UL36	No
LoRTIA	Medium	33127	33376	69	-	UL36.40-S2	No
LoRTIA	Medium	33127	33488	43	-	UL36.40-S	No
LoRTIA	Low	33127	33668	8	-	UL36.40	No
LoRTIA	Medium	33127	33695	14	-	UL36.38-S	No
LoRTIA	Medium	33127	33809	45	-	UL36.38	No
LoRTIA	Medium	33127	34786	18	-	UL36.43-S	No
LoRTIA	Low	33127	34988	9	-	UL36.43	No
LoRTIA	Medium	42494	43962	22	-	UL37.5-S2	No
LoRTIA	Medium	42494	43840	24	-	UL37.5	No
LoRTIA	Medium	42494	44034	16	-	UL37.6-S2	No
LoRTIA	Medium	42494	44117	18	-	UL37.6-S	No
LoRTIA	Low	42494	44556	7	-	UL37.6	No
LoRTIA	Medium	45435	46527	35	+	UL38.3	No
LoRTIA	Medium	45791	46527	26	+	UL38.4	No
LoRTIA	Medium	45904	46527	12	+	UL38.5	No
LoRTIA	Medium	45934	46527	14	+	UL38.6	No
LoRTIA	Low	46014	46527	6	+	UL38.6-S	No
LoRTIA	Very low	46400	50136	1	+	UL39L-40	No
LoRTIA	Low	46978	50136	8	+	UL40-L23	No
LoRTIA	Low	47206	50136	6	+	UL40-L22	No
LoRTIA	Low	47243	50136	10	-	UL40-L21	No
LoRTIA	Low	47657	50136	5	-	UL40-L20	No
LoRTIA	Low	47677	50136	9	-	UL40-L19	No
LoRTIA	Low	47692	50136	4	-	UL40-L18	No
LoRTIA	Medium	47777	50136	13	-	UL40-L17	No
LoRTIA	Medium	47804	50136	60	-	UL40-L16	No
LoRTIA	Low	47900	50136	7	-	UL40-L15	No
LoRTIA	Low	47975	50136	10	-	UL40-L14	No
LoRTIA	Medium	48010	50136	16	+	UL40-L13	No
LoRTIA	Medium	48056	50136	51	+	UL40-L12	No
LoRTIA	Low	48117	50136	10	-	UL40-L11	No
LoRTIA	Medium	48131	50136	22	+	UL40-L10	No
LoRTIA	Low	48144	50136	7	+	UL40-L9	No
LoRTIA	Medium	48188	50136	19	+	UL40-L8	No
LoRTIA	Medium	48274	50136	36	+	UL40-L7	No
LoRTIA	Medium	48361	50136	53	+	UL40-L6	No
LoRTIA	Medium	48422	50136	17	+	UL40-L5	No
LoRTIA	Medium	48558	50136	18	-	UL40-L4	No
LoRTIA	Medium	48783	50136	15	+	UL40-L3	No
LoRTIA	Medium	48901	50136	61	-	UL40-L2	No
LoRTIA	Medium	48944	50136	27	+	UL40-L1	No
LoRTIA	Medium	48994	50136	33	+	UL40-S	No
LoRTIA	Medium	49180	50136	46	+	UL40.2	No
LoRTIA	Medium	49215	50136	25	+	UL40.3	No
LoRTIA	Medium	49292	50136	13	+	UL40.3-S	No
LoRTIA	Medium	49420	50136	62	+	UL40.3-S2	No
LoRTIA	Medium	49446	50136	20	+	UL40.3-S3	No
LoRTIA	Medium	49685	50136	34	+	UL40.6	No
LoRTIA	Medium	49752	50136	66	+	UL40.6-S	No
LoRTIA	Very low	50555	51106	1	-	UL41.11	No
LoRTIA	Low	50555	51155	7	-	UL41.9	No
LoRTIA	Very low	50555	51334	3	-	UL41.7	No
LoRTIA	Low	50555	51500	6	-	UL41.4	No
LoRTIA	Medium	50555	51608	28	-	UL41.2	No
LoRTIA	Very low	51662	55685	1	+	UL42L-43-44	No
LoRTIA	Very low	51662	54119	1	+	UL42L-43	No
LoRTIA	Very low	52009	54119	1	+	UL43-L3	No
LoRTIA	Medium	52009	52962	20	+	UL42.3	No
LoRTIA	Very low	52635	54119	2	+	UL43-L2	No
LoRTIA	Medium	52635	52962	61	+	UL42.5	No
LoRTIA	Very low	52807	54119	3	-	UL43-L	No
LoRTIA	Medium	52807	52962	32	+	UL42.5-S	No
LoRTIA	Very low	53174	55685	3	+	UL44-L6	No
LoRTIA	Medium	53174	54119	15	+	UL43.6	No
LoRTIA	Very low	53314	55685	3	+	UL44-L5	No
LoRTIA	Medium	53314	54119	23	+	UL43.9	No
LoRTIA	Very low	53331	55685	1	-	UL44-L4	No
LoRTIA	Low	53331	54119	10	+	UL43.9-S	No
LoRTIA	Low	53946	55685	8	+	UL44-L3	No
LoRTIA	Low	53946	54119	4	+	UL43.13	No
LoRTIA	Medium	54261	55685	17	+	UL44.4	No
LoRTIA	Medium	54388	55685	78	+	UL44.4-S	No
LoRTIA	High	54435	55685	116	+	UL44.4-S2	No
LoRTIA	Very low	54435	55795	2	+	UL44.4-S2-AT	No
LoRTIA	Medium	54459	55685	67	+	UL44.4-S3	No
LoRTIA	Very low	54496	55685	2	+	UL44.4-S4	No
LoRTIA	High	54521	55685	191	+	UL44.4-S5	No
LoRTIA	Very low	54521	55795	1	+	UL44.4-S5-AT	No
LoRTIA	Medium	54578	55685	37	+	UL44.4-S6	No
LoRTIA	Medium	54690	55685	59	+	UL44.4-S7	No
LoRTIA	High	54734	55685	141	+	UL44.4-S8	No
LoRTIA	High	54770	55685	196	+	UL44.4-S9	No
LoRTIA	Very low	54770	55795	1	+	UL44.4-S9-AT	No
LoRTIA	High	54815	55685	283	+	UL44.4-S10	No
LoRTIA	High	54831	55685	120	+	UL44.4-S11	No
LoRTIA	Medium	54862	55685	57	+	UL44.4-S12	No
LoRTIA	High	54891	55685	118	+	UL44.4-S13	No
LoRTIA	Medium	54946	55685	72	+	UL44.4-S14	No
LoRTIA	Medium	54979	55685	51	+	UL44.4-S15	No
LoRTIA	Medium	55000	55685	80	+	UL44.4-S16	No
LoRTIA	Medium	55022	55685	24	+	UL44.4-S17	No
LoRTIA	Medium	55044	55685	58	+	UL44.4-S18	No
LoRTIA	Medium	55086	55685	29	+	UL44.4-S19	No
LoRTIA	Medium	55248	55685	43	+	UL44.4-S20	No
LoRTIA	Medium	55359	55685	46	+	UL44.4-S21	No
LoRTIA	Medium	55426	55685	35	+	UL44.4-S22	No
LoRTIA	Medium	55485	55685	49	+	UL44.4-S23	No
LoRTIA	Very low	55794	58051	1	-	UL26-26.5-L	No
LoRTIA	Very low	55794	63929	1	-	CTO-UL22-UL23-UL24-UL25-26	No
LoRTIA	Medium	55794	56195	97	-	UL26.9-S	No
LoRTIA	Medium	55794	56249	33	-	UL26.9	No
LoRTIA	Medium	55794	56323	31	-	UL26.8	No
LoRTIA	High	55794	56704	4410	-	UL26.6	No
LoRTIA	Very low	55833	57462	2	-	UL26-26.5-AT	No
LoRTIA	Medium	56833	57462	15	-	nc-UL26	No
LoRTIA	Very low	56833	59086	1	-	UL25-AT	No
LoRTIA	Medium	58518	60767	12	+	UL23-L4	No
LoRTIA	Very low	59141	62856	1	+	UL23L-22	No
LoRTIA	Very low	59803	60767	1	+	UL23.4	No
LoRTIA	Medium	59928	60767	14	+	UL23.4-S	No
LoRTIA	Very low	60309	62856	1	+	UL22-L	No
LoRTIA	Medium	60309	60767	37	+	UL23.6	No
LoRTIA	Medium	61594	62856	49	+	UL22.5	No
LoRTIA	Low	62137	62856	7	+	UL22.8	No
LoRTIA	Low	62516	62856	4	+	UL22.11	No
LoRTIA	Low	62660	62856	10	+	UL22.13	No
LoRTIA	Very low	63673	65130	1	-	CTO-M-L	No
LoRTIA	Medium	64639	65130	36	-	UL21.5	No
LoRTIA	Low	64639	66088	6	-	UL21.2-S	No
LoRTIA	Medium	64639	66163	26	-	UL21.2	No
LoRTIA	Very low	67259	72044	1	+	UL18-L17	No
LoRTIA	Low	67303	71025	5	+	UL19.9	No
LoRTIA	Low	67465	71025	6	+	UL19.11	No
LoRTIA	Very low	67912	71025	2	+	UL19.12	No
LoRTIA	Very low	68011	71025	2	+	UL19.12-S	No
LoRTIA	Low	68237	71025	6	+	UL19.16	No
LoRTIA	Medium	68507	71025	12	+	UL19.18	No
LoRTIA	Medium	68564	71025	13	+	UL19.19	No
LoRTIA	Medium	68627	71025	16	+	UL19.19-S	No
LoRTIA	Low	68773	71025	7	+	UL19.20	No
LoRTIA	Medium	68863	71025	13	+	UL19.22	No
LoRTIA	Low	68963	71025	9	+	UL19.24-S	No
LoRTIA	Medium	69042	71025	24	+	UL19.24-S2	No
LoRTIA	Very low	69132	72044	1	+	UL18-L16	No
LoRTIA	Very low	69173	72044	1	+	UL18-L15	No
LoRTIA	Medium	69173	71025	24	+	UL19.25	No
LoRTIA	Medium	69289	71025	42	+	UL19.25-S	No
LoRTIA	Very low	69379	72044	2	+	UL18-L14	No
LoRTIA	Medium	69416	71025	52	+	UL19.27	No
LoRTIA	Medium	69538	71025	16	+	UL19.29	No
LoRTIA	Medium	69688	71025	14	+	UL19.30	No
LoRTIA	Very low	69750	72044	2	+	UL18-L13	No
LoRTIA	Medium	69765	71025	23	+	UL19.31	No
LoRTIA	Medium	69817	71025	15	+	UL19.31-S	No
LoRTIA	Medium	69899	71025	56	+	UL19.32	No
LoRTIA	Very low	69994	72044	2	+	UL18-L12	No
LoRTIA	Medium	69994	71025	29	+	UL19.33	No
LoRTIA	Low	70036	72044	4	+	UL18-L11	No
LoRTIA	Very low	70061	72044	1	+	UL18-L10	No
LoRTIA	Medium	70061	71025	57	+	UL19.35	No
LoRTIA	Very low	70117	72044	1	+	UL18-L9	No
LoRTIA	Very low	70177	72044	2	+	UL18-L8	No
LoRTIA	Medium	70177	71025	38	+	UL19.35-S	No
LoRTIA	Very low	70219	72044	2	+	UL18-L7	No
LoRTIA	Very low	70271	72044	3	+	UL18-L6	No
LoRTIA	Medium	70271	71025	41	+	UL19.37	No
LoRTIA	Medium	70327	71025	15	+	UL19.38	No
LoRTIA	Very low	70453	72044	2	+	UL18-L5	No
LoRTIA	Medium	70453	71025	29	+	UL19.38-S	No
LoRTIA	Very low	70518	72044	1	+	UL18-L4	No
LoRTIA	Low	70596	72044	9	+	UL18-L3	No
LoRTIA	Low	70638	72044	7	+	UL18-L2	No
LoRTIA	Medium	70638	71025	93	+	nc-UL19	No
LoRTIA	Very low	70817	72044	2	+	UL18-L	No
LoRTIA	Medium	70817	71025	30	+	nc-UL19-S	No
LoRTIA	High	71033	72019	338	+	UL18-AT	No
LoRTIA	Medium	71539	72044	19	+	UL18.5	No
LoRTIA	Medium	72049	72384	13	-	FORF15-S2	No
LoRTIA	Medium	72049	73215	11	-	FORF15-S	No
LoRTIA	Medium	72049	73641	14	-	FORF15-L2	No
LoRTIA	Very low	72049	78466	0	-	15E1-16-17	No
LoRTIA	Very low	73154	76147	2	+	UL17L-16	No
LoRTIA	Medium	74829	76147	11	+	UL16-L	No
LoRTIA	Medium	75641	76147	17	+	UL16.2	No
LoRTIA	Medium	75656	76147	22	+	UL16.2-S	No
LoRTIA	Medium	75813	76147	20	+	UL16.2-S2	No
LoRTIA	Low	78759	80471	9	+	UL12S-11	No
LoRTIA	Low	78810	80471	7	+	UL12S2-11	No
LoRTIA	Medium	79306	80471	24	+	UL-11-L6	No
LoRTIA	Medium	79444	80471	51	+	UL-11-L5	No
LoRTIA	Low	79499	80471	9	+	UL-11-L4	No
LoRTIA	Low	79537	80471	5	+	UL-11-L3	No
LoRTIA	Low	79618	80471	7	+	UL-11-L7	No
LoRTIA	Medium	79790	80471	16	+	UL-11-L	No
LoRTIA	High	79919	80471	2141	+	UL11-L2	No
LoRTIA	Medium	79992	80471	18	+	UL-11-S	No
LoRTIA	Medium	80264	80471	33	+	UL11.5	No
LoRTIA	Low	80906	83750	7	-	UL10-L8	No
LoRTIA	Medium	80906	81045	39	-	nc-UL10	No
LoRTIA	Very low	81636	86712	1	+	UL9L-8	No
LoRTIA	Low	83054	86712	4	+	UL8-L2	No
LoRTIA	Very low	84337	86712	1	+	UL8-L	No
LoRTIA	Low	85649	86712	7	+	UL8.5	No
LoRTIA	Low	86152	86712	4	+	UL8.5-S	No
LoRTIA	Medium	86221	86712	14	+	UL8.5-S2	No
LoRTIA	Medium	86678	87797	16	-	UL7-L2	No
LoRTIA	Medium	86678	87994	26	-	UL7-L3	No
LoRTIA	Low	86678	88411	5	-	UL7-L4	No
LoRTIA	Very low	86678	91422	1	-	UL6L-7	No
LoRTIA	Low	86678	87475	5	-	UL7.5	No
LoRTIA	Low	88702	92606	4	+	UL5L2-4	No
LoRTIA	Very low	89680	92106	1	+	UL5.3	No
LoRTIA	Medium	90430	92606	23	+	UL4-L5	No
LoRTIA	Very low	90430	92106	2	+	UL5.5	No
LoRTIA	Low	90796	92606	7	+	UL4-L4	No
LoRTIA	Very low	90796	92106	1	+	Ul5.6	No
LoRTIA	Medium	91479	92606	38	+	UL4-L3	No
LoRTIA	Medium	91701	92606	24	+	UL4-L2	No
LoRTIA	Medium	91907	92606	61	+	UL4-L	No
LoRTIA	High	92095	92606	162	+	UL4.2	No
LoRTIA	Low	92616	93830	8	-	UL3.5-L	No
LoRTIA	Low	92616	94545	4	-	UL3L-3.5	No
LoRTIA	Very low	92616	96226	1	+	UL1L-2-3-3.5	No
LoRTIA	Low	92616	94673	4	-	UL3L2-3.5	No
LoRTIA	Very low	92616	96003	1	-	UL1L2-2-3-3.5	No
LoRTIA	Medium	92616	93190	19	-	nc-UL3.5	No
LoRTIA	Very low	96421	96627	2	-	nc-EP0	No
LoRTIA	Low	96421	97166	4	-	EP0.10	No
LoRTIA	Low	96421	97403	8	-	EP0.4	No
LoRTIA	Low	102865	107767	9	-	IE180-S	No
LoRTIA	Medium	107706	109304	36	+	NOIR1-L3	No
LoRTIA	Medium	108216	109304	51	+	NOIR-1S2	No
LoRTIA	Medium	108426	109304	18	+	NOIR-1S3	No
LoRTIA	Medium	108624	109304	50	+	NOIR-1S4	No
LoRTIA	Medium	116984	117407	37	+	TRS1-L3	No
LoRTIA	Medium	116995	117407	22	+	TRS1-L2	No
LoRTIA	Medium	117043	117407	38	+	TRS1-L	No
LoRTIA	High	117152	117407	402	+	TRS1-S	No
LoRTIA	Low	119374	121045	9	+	US4-L	No
LoRTIA	Medium	119569	121045	17	+	US4.2	No
LoRTIA	Medium	119694	121045	65	+	US4.3	No
LoRTIA	Medium	119788	121045	31	+	US4.3-S	No
LoRTIA	Medium	119911	121045	45	+	US4.5	No
LoRTIA	Medium	119971	121045	29	+	US4.5-S	No
LoRTIA	Medium	120003	121045	17	+	US4.5-S2	No
LoRTIA	Medium	120067	121045	65	+	US4.6	No
LoRTIA	Medium	120199	121045	53	+	US4.6-S	No
LoRTIA	Medium	120648	121045	29	+	US4.7	No
LoRTIA	Medium	120823	121045	25	+	US4.7-S	No
LoRTIA	Very low	121123	126721	1	+	US6-7-8-9-2	No
LoRTIA	Medium	121502	123483	21	+	US7-L	No
LoRTIA	Very low	121626	123483	3	+	US7-L2	No
LoRTIA	Medium	122283	123483	46	+	US7-L3	No
LoRTIA	Medium	122454	123483	22	+	US7.3	No
LoRTIA	Medium	122826	123483	15	+	US7.3-S	No
LoRTIA	Medium	123031	123483	37	+	US7.3-S2	No
LoRTIA	Very low	123266	125800	2	+	US8-L-US9	No
LoRTIA	Medium	123266	123483	20	+	US7.1	No
LoRTIA	Very low	123882	126721	1	+	US9-US2-L5	No
LoRTIA	Medium	124128	125800	20	+	US9-L6	No
LoRTIA	Low	123882	126721	9	+	US9-US2-L4	No
LoRTIA	Low	124348	125800	8	+	US9-L5	No
LoRTIA	Very low	124155	126721	1	+	US9-US2-L3	No
LoRTIA	Medium	124446	125800	11	+	US9-L4	No
LoRTIA	Very low	124392	126721	1	+	US9-US2-L2	No
LoRTIA	Medium	124748	125800	39	+	US9-L3	No
LoRTIA	Medium	124854	125800	19	+	US9-L2	No
LoRTIA	Low	124970	126721	6	+	US9-US2-L	No
LoRTIA	Medium	125248	125800	14	+	US9-L1	No
LoRTIA	Low	125443	125800	9	+	US9.3	No
LoRTIA	Medium	125675	126721	11	+	US2-L	No
LoRTIA	High	125943	126721	141	+	US2.3	No
LoRTIA	Medium	126000	126721	12	+	US2.3-S	No
LoRTIA	Medium	126179	126721	15	+	US2.3-S2	No
LoRTIA	Medium	126299	126721	81	+	US2.3-S3	No
LoRTIA	Medium	127330	127753	32	-	TRS1-L3-2	No
LoRTIA	Medium	127330	127742	27	-	TRS1-L2-2	No
LoRTIA	Medium	127330	127694	38	-	TRS1-L-2	No
LoRTIA	High	127330	127585	405	-	TRS1-S-2	No
LoRTIA	Medium	135433	137031	34	-	NOIR-1L3-2	No
LoRTIA	Medium	135433	136521	49	-	NOIR-1S3-2	No
LoRTIA	Medium	135433	136242	24	-	NOIR-1S4-2	No
LoRTIA	High	135433	136725	108	-	NOIR-1S2-2	No
LoRTIA	Low	136970	141872	9	+	IE180-S-2	No
LoRTIA	Low	117716	118967	5	-	AZURE-S-L	No
LoRTIA	Low	117716	118967	5	-	AZURE-S-L-splice	No
LoRTIA	Low	96421	98074	5	-	EP0-L2	No
LoRTIA	Medium	96421	97899	15	-	EP0-sp2	No
LoRTIA	Very low	107880	109304	2	+	NOIR-1M-splice	No
LoRTIA	High	135433	136857	104	-	NOIR-1M-splice-2	No
LoRTIA	Very low	72049	77341	1	-	UL15-L-prev.	No
LoRTIA	Very low	72049	78466	1	-	UL15-splice-L	No
LoRTIA	High	115437	117407	207	+	US1-splice-2	No
LoRTIA	High	127330	129300	108	-	US1-splice-2-2	No
LoRTIA	Very low	115437	117407	3	+	US1-splice-3	No
LoRTIA	Low	127330	129300	5	-	US1-splice-3-2	No
LoRTIA	Medium	115437	117407	32	+	US1-splice-4	No
LoRTIA	Medium	127330	129300	23	-	US1-splice-4-2	No
LoRTIA	Low	115437	117407	9	+	US1-splice-5	No
LoRTIA	Medium	127330	129300	11	-	US1-splice-5-2	No
LoRTIA	Medium	115437	117407	92	+	US1-splice-6	No
LoRTIA	Medium	127330	129300	22	-	US1-splice-6-2	No
LoRTIA	Low	96421	97712	7	-	EP0.5-S	No
Manual	Very low	4639	8517	1	-	UL51-52	No
Manual	Very low	7466	10414	1	+	UL51L-50-49.5-49	No
Manual	Very low	8343	10414	1	+	UL50-49.5-49-L	No
Manual	Very low	9199	10414	1	+	UL49.5-49	No
Manual	Very low	28901	32683	1	+	UL32-33-34-35	No
Manual	Very low	39925	46527	1	+	UL37-38	No
Manual	Very low	50405	52959	1	+	UL41-42	No
Manual	Very low	55794	59532	1	-	UL25L-26-26.5	No
Manual	Very low	56412	60767	1	+	UL25-24-23	No
Manual	Very low	76177	80430	1	+	UL14L-13-12	No
Manual	Very low	50541	55407	1	-	UL44-43-42-41	No
Manual	Very low	93000	94219	1	-	UL3	Yes
Manual	Very low	119427	120911	1	-	US4-AS1	Yes
Manual	Very low	119431	121915	1	+	US4-AT	Yes
Manual	Very low	121123	122410	1	+	US6	Yes
Manual	Very low	125795	126816	1	+	US2-AT2	Yes
Manual	Very low	161	2284	1	+	ORF-1L2	Yes
Manual	Very low	323	2284	1	+	ORF-1L1	Yes
Manual	Very low	16230	19771	1	-	UL27-AT1	Yes
Manual	Very low	16868	25577	1	-	UL29-28-27	Yes
Manual	Very low	18869	21770	1	-	UL28	Yes
Manual	Very low	30505	31460	1	+	UL33	Yes
Manual	Very low	32305	33150	1	+	UL35-AT	Yes
Manual	Very low	56220	59072	1	-	UL25	Yes
Manual	Very low	59585	60870	1	+	UL23-AT	Yes
Manual	Very low	60751	63635	1	+	UL22-AT	Yes
Manual	Very low	65038	66258	1	-	UL21-AT2	Yes
Manual	Very low	10455	11900	1	+	UL48	Yes
Manual	Very low	13169	14179	1	+	UL47.3	Yes
Manual	Very low	21775	25578	1	-	UL29	Yes
Manual	Very low	28692	31139	1	-	UL32-S-31	Yes
Manual	Very low	28694	31305	1	-	UL32-31	Yes
Manual	Very low	52970	55685	1	+	UL43-44	Yes
Manual	Very low	89432	92605	1	+	UL5-4	Yes
Manual	Very low	90928	92602	1	+	UL-5-4-S	Yes
Manual	Very low	121123	123483	1	+	US6-7	Yes
Manual	Very low	122351	126721	1	+	US7-8-9-2	Yes
Manual	Very low	123547	126721	1	+	US8-9-2	Yes
Manual	Very low	133156	134057	1	+	NOIR-2	Yes
Manual	Very low	30505	31460	1	+	UL33	Yes
Manual	Very low	59585	60870	1	+	UL23-AT	Yes
Manual	Very low	66312	66898	1	+	UL20	Yes
Manual	Very low	80906	84325	1	-	UL10-L7	Yes
Manual	Very low	92618	92969	1	-	TRL3.5	Yes
Manual	Very low	50647	54119	1	+	UL42-43-L	Yes
Manual	Very low	63670	66327	1	-	CTO-L2	Yes
LoRTIA	High	990	2284	1319	+	ORF-1M2	Yes
LoRTIA	High	1338	2284	1124	+	ORF-1M1	Yes
LoRTIA	High	1608	2284	851	+	ORF-1	Yes
LoRTIA	High	2769	3901	115	-	UL54	Yes
LoRTIA	Medium	2769	4916	24	-	UL53-54	Yes
LoRTIA	Very low	2769	7749	1	-	UL52-53-54	Yes
LoRTIA	High	7579	8514	278	+	UL51-50-49.5-49	Yes
LoRTIA	Medium	7579	10414	33	+	UL51	Yes
LoRTIA	High	8478	9205	226	-	UL50S	Yes
LoRTIA	High	8478	9485	2515	-	UL50	Yes
LoRTIA	Medium	8478	9581	92	-	UL50L	Yes
LoRTIA	High	9104	10414	1733	+	UL49.5-49	Yes
LoRTIA	High	9261	10414	2397	+	UL49.5-S-49	Yes
LoRTIA	High	9539	10414	393	+	UL49-L	Yes
LoRTIA	High	9637	10414	3665	+	Ul49	Yes
LoRTIA	Medium	10419	16234	47	+	UL48-47-46	Yes
LoRTIA	High	11781	16234	147	+	UL47-46	Yes
LoRTIA	High	14051	16234	3140	+	UL46	Yes
LoRTIA	High	16869	19771	2972	-	UL27	Yes
LoRTIA	High	16869	17753	132	-	UL27.5-S	Yes
LoRTIA	Medium	16869	18052	60	-	UL27.5	Yes
LoRTIA	Medium	16869	18237	42	-	UL27.5-L	Yes
LoRTIA	Medium	21775	25578	50	-	UL29	Yes
LoRTIA	High	21775	22237	365	-	TRL29.2	Yes
LoRTIA	Low	25685	28897	5	+	UL30	Yes
LoRTIA	High	28694	29679	7848	-	UL31	Yes
LoRTIA	Medium	28694	31139	56	-	UL32-S-31	Yes
LoRTIA	Medium	28694	31303	16	-	UL32-31	Yes
LoRTIA	Medium	28694	29419	51	-	UL31-L	Yes
LoRTIA	Medium	28694	29772	60	-	UL31.5	Yes
LoRTIA	Medium	29733	32683	25	+	UL33-L2-34-35	Yes
LoRTIA	Low	30563	32683	5	+	UL33-34-35	Yes
LoRTIA	High	31360	32683	1128	+	UL34-35	Yes
LoRTIA	High	32306	32683	5746	+	UL35	Yes
LoRTIA	Medium	32431	32683	73	+	TRL35	Yes
LoRTIA	High	33127	34930	490	-	UL36.5	Yes
LoRTIA	Very low	33127	42484	2	-	UL36-UL36.5	Yes
LoRTIA	Very low	33127	45378	3	-	UL37-36	Yes
LoRTIA	High	42494	45378	433	-	UL37	Yes
LoRTIA	High	45301	46527	9421	+	UL38	Yes
LoRTIA	Medium	45301	50136	28	+	UL38-39-40	Yes
LoRTIA	High	46515	50136	104	+	UL39-40-L	Yes
LoRTIA	High	46722	50136	133	+	UL39-40	Yes
LoRTIA	High	49056	50136	3376	+	UL40	Yes
LoRTIA	High	49604	50136	258	+	TRL40	Yes
LoRTIA	High	50555	51661	342	-	UL41	Yes
LoRTIA	Medium	51662	52962	46	+	UL42-L1	Yes
LoRTIA	Medium	51749	55685	96	+	UL42-43-44	Yes
LoRTIA	High	51749	52962	5960	+	UL42	Yes
LoRTIA	High	52969	54119	579	+	UL43	Yes
LoRTIA	High	52985	54119	3582	+	UL43-S	Yes
LoRTIA	High	52985	55685	211	+	UL43-44	Yes
LoRTIA	High	54173	55685	8787	+	UL44	Yes
LoRTIA	Medium	54173	55795	49	+	UL44-AT	Yes
LoRTIA	High	55794	57462	1011	-	UL26-26.5	Yes
LoRTIA	Low	55794	59793	7	-	UL24-25-26-26.5	Yes
LoRTIA	Medium	55794	59086	72	-	UL25-26-26.5	Yes
LoRTIA	Medium	58994	60767	13	+	UL23-L3	Yes
LoRTIA	Medium	59141	60767	48	+	UL23-L2	Yes
LoRTIA	High	59560	60767	1303	+	UL23-L1	Yes
LoRTIA	High	59584	60767	4367	+	UL23	Yes
LoRTIA	Low	59584	62856	8	+	UL23-22	Yes
LoRTIA	High	60750	62856	138	+	UL22	Yes
LoRTIA	High	63673	63929	570653	-	CTO-S	Yes
LoRTIA	High	63673	64633	475	-	CTO-M	Yes
LoRTIA	Medium	63673	66258	14	-	CTO-L	Yes
LoRTIA	High	64639	66258	1740	-	UL21	Yes
LoRTIA	Medium	64639	66386	32	-	UL21-L	Yes
LoRTIA	Medium	66311	71025	38	+	UL20-19	Yes
LoRTIA	High	66844	71025	261	+	UL19	Yes
LoRTIA	Low	66844	72044	7	+	UL19-18	Yes
LoRTIA	High	71033	72044	20453	+	UL18	Yes
LoRTIA	Very low	71033	76147	3	+	UL18-17-16	Yes
LoRTIA	Low	72049	77341	5	-	UL15-sp	Yes
LoRTIA	Medium	72049	73610	45	-	FORF15	Yes
LoRTIA	Medium	72049	74847	45	-	FORF15-L	Yes
LoRTIA	High	73261	76147	144	+	UL17-16	Yes
LoRTIA	High	74902	76147	12204	+	UL16	Yes
LoRTIA	High	77164	80471	277	+	UL14-13-12-11	Yes
LoRTIA	Medium	77471	80471	32	+	UL13-12-11	Yes
LoRTIA	High	78516	80471	252	+	UL12-11	Yes
LoRTIA	High	80906	82358	8711	-	UL10	Yes
LoRTIA	High	80906	82394	356	-	UL10 -L1	Yes
LoRTIA	High	80906	82451	190	-	UL10-L3	Yes
LoRTIA	Medium	80906	82580	42	-	UL10-L4	Yes
LoRTIA	High	80906	81389	179	-	UL10.4	Yes
LoRTIA	Medium	80906	81605	51	-	UL10.5	Yes
LoRTIA	Medium	80906	81868	89	-	UL10.6	Yes
LoRTIA	High	80906	81983	185	-	UL10.7	Yes
LoRTIA	Medium	80906	82105	77	-	UL10-S	Yes
LoRTIA	High	84520	86712	108	+	UL8	Yes
LoRTIA	High	86678	87708	549	-	UL7	Yes
LoRTIA	Medium	86678	89626	92	-	UL6-7	Yes
LoRTIA	Medium	89430	92106	12	+	UL5	Yes
LoRTIA	Low	89680	92606	5	+	UL5-4-M	Yes
LoRTIA	Medium	90928	92606	34	+	UL5-4-S	Yes
LoRTIA	High	91956	92606	2568	+	UL4	Yes
LoRTIA	High	92616	93501	2982	-	UL3.5	Yes
LoRTIA	High	92616	94219	513	-	UL3-3.5	Yes
LoRTIA	High	92616	95079	221	-	UL2-3-3.5	Yes
LoRTIA	High	92616	95500	204	-	UL1-2-3-3.5	Yes
LoRTIA	Very low	93794	95079	1	-	UL2	Yes
LoRTIA	Low	102865	107957	8	-	IE180	Yes
LoRTIA	High	107830	109304	453	+	NOIR-1L	Yes
LoRTIA	High	108012	109304	109	+	NOIR-1S	Yes
LoRTIA	Medium	110676	111580	21	-	NOIR-2	Yes
LoRTIA	High	127330	127666	111	-	TRS1-2	Yes
LoRTIA	Medium	133157	134060	21	+	NOIR-2-2	Yes
LoRTIA	Medium	135433	136753	35	-	NOIR-1S-2	Yes
LoRTIA	High	135433	136907	455	-	NOIR-1L-2	Yes
LoRTIA	Low	136780	141872	8	+	IE180-2	Yes
LoRTIA	High	96421	97899	797	-	EP0	Yes
LoRTIA	High	96421	97875	586	-	EP0.5	Yes
LoRTIA	High	96421	97899	314	-	EP0-sp1	Yes
LoRTIA	Low	115464	117071	7	+	NCS1	Yes
LoRTIA	Medium	127650	129300	11	-	NCS1-2	Yes
LoRTIA	High	107880	109304	1274	+	NOIR-1M	Yes
LoRTIA	High	135433	136857	516	-	NOIR-1M-2	Yes
LoRTIA	Very low	72049	77341	1	-	UL15	Yes
LoRTIA	High	115437	117407	296	+	US1	Yes
LoRTIA	High	127330	129300	2394	-	US1-2	Yes
LoRTIA	High	115437	117407	8932	+	US1-splice	Yes
LoRTIA	High	115437	117407	3746	+	US1-splice(2)	Yes
LoRTIA	Low	115437	117407	4	+	US1-splice-L2	Yes
LoRTIA	Low	115437	117407	4	+	US1-splice-L-2	Yes
Manual	Very low	8588	10414	1	+	UL50-49.5-49	Yes
Manual	Very low	21775	22737	1	-	UL29.2	Yes
Manual	Very low	63143	63929	1	-	CTO-AT	Yes
Manual	Very low	64644	66789	1	-	UL21-L2	Yes
Manual	Very low	64679	67430	1	-	UL20-21-C	Yes
Manual	Very low	96421	97875	1	-	EP0.5-sp1	Yes
Manual	Very low	101069	102896	1	+	ELIE-1	Yes
Manual	Very low	102143	102896	1	+	ELIE-2	Yes
Manual	Very low	113321	117407	1	+	PTO-US1	Yes
Manual	Very low	117071	117407	1	+	TRS1	Yes
Manual	Very low	117718	118915	1	-	AZURE-S	Yes
Manual	Very low	117718	119756	1	-	AZURE-L	Yes
Manual	Very low	117718	119305	1	-	AZURE-M	Yes
Manual	Very low	117718	120177	1	-	AZURE-L2	Yes
Manual	Very low	118176	121045	1	+	US3-L-4	Yes
Manual	Very low	118336	121045	1	+	US3-4	Yes
Manual	Very low	119431	121045	1	+	US4	Yes
Manual	Very low	119431	123483	1	+	US4-6-7	Yes
Manual	Very low	121123	123483	1	+	US6-7	Yes
Manual	Very low	122351	127019	1	+	US7-8-9-2-AT1	Yes
Manual	Very low	122352	125800	1	+	US7-8-9	Yes
Manual	Very low	122352	123483	1	+	US7	Yes
Manual	Very low	122352	126721	1	+	US7-8-9-2	Yes
Manual	Very low	123547	125800	1	+	US8-9	Yes
Manual	Very low	123547	126721	1	+	US8-9-2	Yes
Manual	Very low	123547	127026	1	+	US8-9-2-AT1	Yes
Manual	Very low	125327	125800	1	+	US9	Yes
Manual	Very low	125327	126721	1	+	US9-2	Yes
Manual	Very low	125795	126721	1	+	US2	Yes
Manual	Very low	125795	127019	1	+	US2-AT	Yes
Manual	Very low	127330	131414	1	-	PTO-US1	Yes
Manual	Very low	93000	94219	1	-	UL3	Yes
Manual	Very low	119427	120911	1	-	US4-AS1	Yes
Manual	Very low	119431	121915	1	+	US4-AT	Yes
Manual	Very low	121123	122410	1	+	US6	Yes
Manual	Very low	161	2284	1	+	ORF-1L2	Yes
Manual	Very low	323	2284	1	+	ORF-1L1	Yes
Manual	Very low	16230	19771	1	-	UL27-AT1	Yes
Manual	Very low	16868	25577	1	-	UL29-28-27	Yes
Manual	Very low	18869	21770	1	-	UL28	Yes
Manual	Very low	30505	31460	1	+	UL33	Yes
Manual	Very low	32305	33150	1	+	UL35-AT	Yes
Manual	Very low	56220	59072	1	-	UL25	Yes
Manual	Very low	59585	60870	1	+	UL23-AT	Yes
Manual	Very low	60751	63635	1	+	UL22-AT	Yes
Manual	Very low	65038	66258	1	-	UL21-AT2	Yes
Manual	Very low	74915	75826	1	-	UL16-AS	Yes
Manual	mRNA	96421	97875	3	-	EP0.5-sp2	Yes
Manual	mRNA	96421	97664	14	-	EP0.5-S2-sp1	Yes
Manual	Very low	63684	63929	1	+	nc-CTO-S	No
Manual	Very low	64359	66162	1	+	UL21-as	No
Manual	Very low	62860	63929	1	-	CTO-AT2	No
Manual	Very low	101708	102886	1	+	ELIE-2-L	No
